# Supplementary material for: Improving Nutritional and Health Benefits of Biscuits by Optimizing Formulations Based on Sprouted Pseudocereal Grains
Source: MDPI journal article supplement (doi:10.3390/foods11111533), 2022-05-24
Supplement: s1 [file s1]

Supplementary material

# Improving Nutritional and Health Benefits of Biscuits by Optimizing Formulations Based on Sprouted Pseudocereal Grains from Andean Origin

Luz María Paucar-Menacho <sup>1</sup>, Wilson Daniel Simpalo-López <sup>1</sup>, Williams Estiward Castillo-Martínez <sup>1</sup>, Lourdes Jossefyne Esquivel-Paredes <sup>1</sup> and Cristina Martínez-Villaluenga <sup>2,\*</sup>

<sup>1</sup> Departamento de Agroindustria y Agronomía, Facultad de Ingeniería, Universidad del Santa, 02711 Nuevo Chimbote, Ancash, Perú; luzpaucar@uns.edu.pe (L.P.-M.); wsimpalol@uns.edu.pe (W.D.S.-L.); wcastillo@uns.edu.pe (W.E.C.-M.); lourdes.ep@gmail.com (L.J. E-P.)

<sup>2</sup> Department of Food Characterization, Quality and Safety, Institute of Food Science, Technology and Nutrition (ICTAN-CSIC), 28040 Madrid, Spain; c.m.villaluenga@csic.es (C. M.-V.)

\* Correspondence: c.m.villaluenga@csic.es (C. M.-V.); Tel.: +34913939927

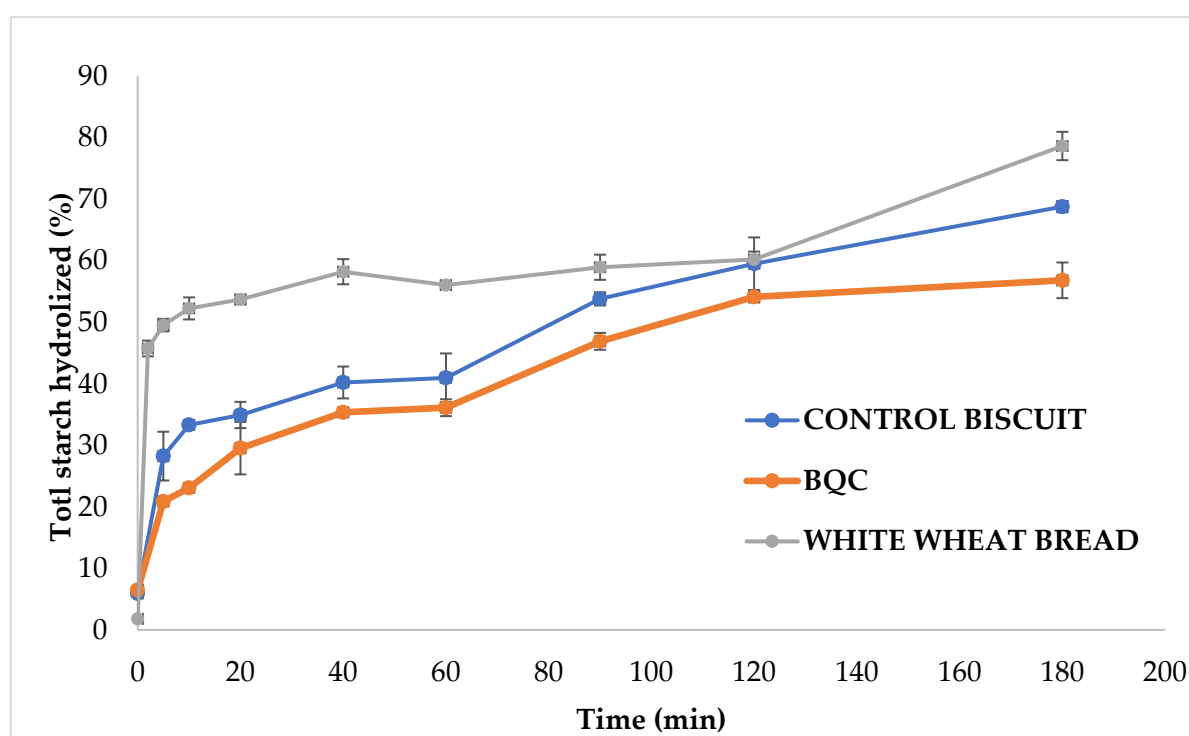

**Figure S1.** Starch hydrolysis kinetic of control biscuit (100% WF), BQC (15% SQF, 25% SCF, and 60% WF) and white wheat bread (100% WF).

**Table S1.** Sprouting conditions of cañihua, kiwicha, and quinoa grains.

| Grains  | Temperature (°C) | Time (h) | Germination Rate (%) |
|---------|------------------|----------|----------------------|
| Cañihua | 20               | 72       | 98                   |
| Kiwicha | 26               | 63       | 100                  |
| Quinoa  | 20               | 42       | 95                   |

The optimal germination temperature and time of cañihua, kiwicha and quinoa was established based on previous optimization studies [1-3].

**Table S2.** Experimental design with three independent variables (blends of three flour types).

| Recipe no. | Proportion of Flours <sup>a</sup>               |                                                 |                               |
|------------|-------------------------------------------------|-------------------------------------------------|-------------------------------|
|            | Sprouted Pseudocereal Flour 1 (X <sub>1</sub> ) | Sprouted Pseudocereal Flour 2 (X <sub>2</sub> ) | Wheat Flour (X <sub>3</sub> ) |
| 1          | 15                                              | 15                                              | 70                            |
| 2          | 20                                              | 20                                              | 60                            |
| 3          | 5                                               | 20                                              | 75                            |
| 4          | 20                                              | 20                                              | 60                            |
| 5          | 5                                               | 20                                              | 75                            |
| 6          | 5                                               | 20                                              | 75                            |
| 7          | 20                                              | 20                                              | 60                            |
| 8          | 10                                              | 25                                              | 65                            |
| 9          | 20                                              | 5                                               | 75                            |
| 10         | 20                                              | 5                                               | 75                            |
| 11         | 10                                              | 10                                              | 80                            |
| 12         | 25                                              | 10                                              | 65                            |
| 13         | 20                                              | 5                                               | 75                            |
| 14         | 25                                              | 10                                              | 65                            |

<sup>a</sup> Composition of flour (expressed as %; sum of ingredients = 100%) used in elaboration of biscuit dough: BQK (X<sub>1</sub>: sprouted quinoa flour; X<sub>2</sub>: sprouted kiwicha flour; X<sub>3</sub>: wheat flour), BQC (X<sub>1</sub>: sprouted quinoa flour; X<sub>2</sub>: sprouted cañihua flour; X<sub>3</sub>: wheat flour) and BKC (X<sub>1</sub>: sprouted kiwicha flour; X<sub>2</sub>: sprouted cañihua flour; X<sub>3</sub>: wheat flour).

#### Abbreviations:

BQC: biscuit formulated with sprouted quinoa, sprouted cañihua and wheat flours; SCF: sprouted cañihua flour; SQF, sprouted quinoa flour; WF: re-fined wheat flour.

#### References

1. Paucar-Menacho, L.M.; Peñas, E.; Dueñas, M.; Frias, J.; Martínez-Villaluenga, C. Optimizing germination conditions to enhance the accumulation of bioactive compounds and the antioxidant activity of kiwicha (*Amaranthus caudatus*) using response surface methodology. *LWT-Food Sci. Technol.* **2017**, *76*, 245–252, doi:10.1016/j.lwt.2016.07.038.
2. Paucar-Menacho, L.M.; Martínez-Villaluenga, C.; Dueñas, M.; Frias, J.; Peñas, E. Response surface optimisation of germination conditions to improve the accumulation of bioactive compounds and the antioxidant activity in quinoa. *Int. J. Food Sci. Technol.* **2018**, *53*, 516–524, doi:10.1111/ijfs.13623.
3. Abderrahim, F.; Huanatico, E.; Repo-Carrasco-Valencia, R.; Arribas, S.M.; Gonzalez, M.C.; Condezo-Hoyos, L. Effect of germination on total phenolic compounds, total antioxidant capacity, Maillard reaction products and oxidative stress markers in canihua (*Chenopodium pallidicaule*). *J. Cereal Sci.* **2012**, *56*, 410–417, doi:https://doi.org/10.1016/j.jcs.2012.04.013.
